# Supplementary material for: Bedside quantification of dead-space fraction using routine clinical data in patients with acute lung injury: secondary analysis of two prospective trials
Source: Crit Care. 2010 Jul 29;14(4):R141. doi: 10.1186/cc9206 (PMC2945122; doi:10.1186/cc9206)
Supplement: Additional file 1 — ARDS-net investigator. The names and affiliations of ARDS-net investigators. [file cc9206-S1.DOC]

**Additional file:**

**Participants in the National Heart, Lung, and Blood Institute(NHLBI) ARDS Clinical Trials Network were as follows**: *Investigators(principal investigators are marked with an asterisk): ClevelandClinic Foundation* — H.P. Wiedemann,* A.C. Arroliga, C.J.Fisher, Jr., J.J. Komara, Jr., P. Periz-Trepichio; *Denver HealthMedical Center* — P.E. Parsons; *Denver Veterans AffairsMedical Center* — C. Welsh; *Duke University Medical Center*— W.J. Fulkerson, Jr.,* N. MacIntyre, L. Mallatratt, M.Sebastian, J. Davies, E. Van Dyne, J. Govert; *Johns HopkinsBayview Medical Center* — J. Sevransky, S. Murray; *JohnsHopkins Hospital* — R.G. Brower, D. Thompson, H.E. Fessler,S. Murray; *LDS Hospital* — A.H. Morris,* T. Clemmer, R.Davis, J. Orme, Jr., L. Weaver, C. Grissom, F. Thomas, M. Gleich(deceased); *McKay-Dee Hospital* — C. Lawton, J. D'Hulst;*MetroHealth Medical Center of Cleveland* — J.R. Peerless,C. Smith; *San Francisco General Hospital Medical Center* —R. Kallet, J.M. Luce; *Thomas Jefferson University Hospital* —J. Gottlieb, P. Park, A. Girod, L. Yannarell; *University ofCalifornia, San Francisco* — M.A. Matthay,* M.D. Eisner,J. Luce, B. Daniel, T.J. Nuckton; *University of Colorado HealthSciences Center* — E. Abraham,* F. Piedalue, R. Jagusch,P. Miller, R. McIntyre, K.E. Greene; *University of Maryland*— H.J. Silverman,* C. Shanholtz, W. Corral; *Universityof Michigan* — G.B. Toews,* D. Arnoldi, R.H. Bartlett,R. Dechert, C. Watts; *University of Pennsylvania* — P.N.Lanken,* J.D. Christie, B. Finkel, B.D. Fuchs, C.W. Hanson,III, P.M. Reilly, M.B. Shapiro; *University of Utah Hospital*— R. Barton, M. Mone; *University of Washington/HarborviewMedical Center* — L.D. Hudson,* G. Carter, C.L. Cooper,A. Hiemstra, R.V. Maier, K.P. Steinberg, Margaret Neff, PatriciaBerry-Bell; *Utah Valley Regional Medical Center* — T. Hill,P. Thaut; *Vanderbilt University* — A.P. Wheeler,* G. Bernard,*B. Christman, S. Bozeman, T. Swope, L.B. Ware; *Clinical CoordinatingCenter, Massachusetts General Hospital, Harvard Medical School*— D.A. Schoenfeld,* B.T. Thompson, M. Ancukiewicz, D.Hayden, MA, F. Molay, N. Ringwood, C. Oldmixon, A. Korpak, R.Morse; *NHLBI Staff* — D.B. Gail, A. Harabin,* P. Lew, M.Waclawiw*; *Steering Committee* — G.R. Bernard (chair);*Data and Safety Monitoring Board* — R.G. Spragg (chair),J. Boyett, J. Kelley, K. Leeper, M. Gray Secundy, A.S. Slutsky,B. Turnbull; *Protocol Review Committee* — J.G.N. Garcia(chair), S.S. Emerson, S.K. Pingleton, M.D. Shasby, W.J. Sibbald
